# Supplementary material
Source: PubMed Central journal article supplement (PMC3990248)

## **Supplemental Figure Legend**

### **Supplemental Figure 1 – Beta-Blocker Prescription by Practice**

Among 53 practices in our study cohort, rates of optimal combined prescription of secondary prevention medications ranges from 35.2% to 100%. The median rate of prescription was 78.4%.

CAD: Coronary Artery Disease; MI: Myocardial Infarction

### **Supplemental Figure 2 – ACEI/ARB Prescription by Practice**

Among 56 practices in our study cohort, rates of optimal combined prescription of secondary prevention medications ranges from 39.1% to 100%. The median rate of prescription was 75.5%.

ACEI: Angiotensin Converting Enzyme Inhibitor; ARB: Angiotensin Receptor Blockers; CAD: Coronary Artery Disease; DM: Diabetes Mellitus; LVEF: Left Ventricular Ejection Fraction

### **Supplemental Figure 3 – Statin Prescription by Practice**

Among 47 practices in our study cohort, rates of optimal combined prescription of secondary prevention medications ranges from 10.7% to 100%. The median rate of prescription was 73.3%.

CAD: Coronary Artery Disease; LDL: Low-Density Lipoprotein

Supplemental Table 1 - Patient Characteristics by Beta-Blocker Prescription

|         | <b>Beta Blocker in CAD patients</b> |                        | <b>P-Value</b> |
|---------|-------------------------------------|------------------------|----------------|
|         | <b>Yes<br/>n =63800</b>             | <b>No<br/>n =23199</b> |                |
| Age     | 67.9 +/- 12.5                       | 66.8 +/- 14.1          | <0.001         |
| Male    | 41307<br>(64.9%)                    | 13366 (57.7%)          | <0.001         |
| Race    |                                     |                        | <0.001         |
| White   | 24865<br>(39.0%)                    | 8028 (34.6%)           |                |
| Black   | 1873 (2.9%)                         | 560 (2.4%)             |                |
| Other   | 198 (0.3%)                          | 64 (0.3%)              |                |
| Missing | 36864<br>(57.8%)                    | 14547 (62.7%)          |                |

|                            | <b>Beta Blocker in CAD patients</b> |                        | <b>P-Value</b> |
|----------------------------|-------------------------------------|------------------------|----------------|
|                            | <b>Yes<br/>n =63800</b>             | <b>No<br/>n =23199</b> |                |
| <b>Insurance</b>           |                                     |                        | <0.001         |
| None                       | 2371 (3.7%)                         | 909 (3.9%)             |                |
| Private                    | 32633 (51.1%)                       | 13435 (57.9%)          |                |
| Public                     | 6904 (29.8%)                        |                        |                |
| Unknown                    | 23129 (36.3%)                       | 1951 (8.4%)            |                |
|                            | 5667 (8.9%)                         |                        |                |
| <b>Current Tobacco Use</b> |                                     |                        | <0.001         |
| Yes                        | 10179 (16.0%)                       | 4061 (17.5%)           |                |
| No                         |                                     | 14978 (64.6%)          |                |
| Unknown                    | 45086 (70.7%)                       | 4160 (17.9%)           |                |
|                            | 8535 (13.4%)                        |                        |                |
| <b>Heart Failure</b>       | 25759 (40.4%)                       | 7990 (34.4%)           | <0.001         |

|                     | <b>Beta Blocker in CAD patients</b> |                        | <b>P-Value</b> |
|---------------------|-------------------------------------|------------------------|----------------|
|                     | <b>Yes<br/>n =63800</b>             | <b>No<br/>n =23199</b> |                |
| Dyslipidemia        | 50429<br>(79.0%)                    | 15499 (66.8%)          | <0.001         |
| Diabetes            | 17232<br>(27.0%)                    | 4642 (20.0%)           | <0.001         |
| Hypertension        | 51001<br>(80.0%)                    | 16292 (70.3%)          | <0.001         |
| PAD                 | 13077<br>(20.5%)                    | 3861 (16.6%)           | <0.001         |
| Prior Stroke/TIA    | 9029 (14.2%)                        | 2886 (12.4%)           | <0.001         |
| Angina              | 8519 (13.4%)                        | 1914 (8.3%)            | <0.001         |
| Atrial Fibrillation | 11417<br>(17.9%)                    | 3733 (16.1%)           | <0.001         |

|                              | <b>Beta Blocker in CAD patients</b> |                               | <b>P-Value</b>   |
|------------------------------|-------------------------------------|-------------------------------|------------------|
|                              | <b>N=86999</b>                      |                               |                  |
|                              | <b>Yes<br/>n =63800</b>             | <b>No<br/>n =23199</b>        |                  |
| <b>PCI within 12 months</b>  |                                     |                               | <b>&lt;0.001</b> |
| Yes                          | 15692                               | 4513 (19.5%)                  |                  |
| No                           | (24.6%)                             | 16120 (69.5%)                 |                  |
| Unknown                      | 42913<br>(67.3%)                    | 2566 (11.1%)                  |                  |
|                              | 5195 (8.1%)                         |                               |                  |
| <b>CABG within 12 months</b> |                                     |                               | <b>&lt;0.001</b> |
| Yes                          | 10028<br>(15.7%)                    | 3950 (17.0%)<br>16684 (71.9%) |                  |
| No                           | 48537<br>(76.1%)                    | 2565 (11.1%)                  |                  |
| Unknown                      | 5235 (8.2%)                         |                               |                  |

|                     | <b>Beta Blocker in CAD patients</b> |                        | <b>P-Value</b> |
|---------------------|-------------------------------------|------------------------|----------------|
|                     | <b>Yes<br/>n =63800</b>             | <b>No<br/>n =23199</b> |                |
| MI within 12 months |                                     |                        | <0.001         |
| Yes                 | 27810                               | 11336 (48.9%)          |                |
| No                  | (43.6%)                             | 9448 (40.7%)           |                |
| Unknown             | 31500                               | 2415 (10.4%)           |                |
|                     | (49.4%)                             |                        |                |
|                     | 4490 (7.0%)                         |                        |                |

\*PAD: Peripheral Arterial Disease

† TIA: Transient Ischemic Attack

‡ PCI: Percutaneous Coronary Intervention

§ CABG: Coronary Artery Bypass Graft

□ MI: Myocardial Infarction

Supplemental Table 2 - Patient Characteristics by ACEI/ARB Prescription

|         | <b>ACE/ARB in patients with C</b>           |                        | <b>P-Value</b> |
|---------|---------------------------------------------|------------------------|----------------|
|         | <b>AD and with DM<br/>or LVEF &lt;= 40%</b> |                        |                |
|         | <b>N=80552</b>                              |                        |                |
|         | <b>Yes<br/>n =559<br/>33</b>                | <b>No<br/>n =24619</b> |                |
| Age     | 68.6 +/- 11.1                               | 68.5 +/- 12.5          | 0.293          |
| Male    | 35513<br>(63.7%)                            | 14085 (57.4%)          | <0.001         |
| Race    |                                             |                        | <0.001         |
| White   | 22209<br>(39.7%)                            | 9297 (37.8%)           |                |
| Black   |                                             | 1439 (5.8%)            |                |
| Other   | 3317 (5.9%)                                 | 128 (0.5%)             |                |
| Missing | 265 (0.5%)<br>30142<br>(53.9%)              | 13755 (55.9%)          |                |

|                     | ACE/ARB in patients with C                  |                | P-Value |
|---------------------|---------------------------------------------|----------------|---------|
|                     | AD and with DM<br>or LVEF <= 40%<br>N=80552 |                |         |
|                     | Yes<br>n =559<br>33                         | No<br>n =24619 |         |
| Insurance           |                                             |                | <0.001  |
| None                | 1813 (3.2%)                                 | 881 (3.6%)     |         |
| Private             | 28756<br>(51.4%)                            | 14278 (58.0%)  |         |
| Public              | 8590 (34.9%)                                |                |         |
| Unknown             | 22222<br>(39.7%)<br>3142 (5.6%)             | 870 (3.5%)     |         |
| Current Tobacco Use |                                             |                | <0.001  |
| Yes                 | 7339 (13.1%)                                | 3136 (12.7%)   |         |
| No                  | 40854<br>(73.0%)                            | 17529 (71.2%)  |         |
| Unknown             | 7740 (13.8%)                                | 3954 (16.1%)   |         |
| Heart Failure       | 23637<br>(42.3%)                            | 9004 (36.6%)   | <0.001  |



|                     | <b>ACE/ARB in patients with C</b>                       |                        |                |
|---------------------|---------------------------------------------------------|------------------------|----------------|
|                     | <b>AD and with DM<br/>or LVEF &lt;= 40%<br/>N=80552</b> |                        |                |
|                     | <b>Yes<br/>n =559<br/>33</b>                            | <b>No<br/>n =24619</b> | <b>P-Value</b> |
| Dyslipidemia        | 46685<br>(83.5%)                                        | 19443 (79.0%)          | <0.001         |
| Diabetes            | 48679<br>(87.0%)                                        | 22366 (90.9%)          | <0.001         |
| Hypertension        | 49986<br>(89.4%)                                        | 20427 (83.1%)          | <0.001         |
| PAD                 | 11473<br>(20.5%)                                        | 4756 (19.3%)           | <0.001         |
| Prior Stroke/TIA    | 9387 (16.8%)                                            | 4374 (17.8%)           | <0.001         |
| Angina              | 8143 (14.6%)                                            | 3306 (13.5%)           | <0.001         |
| Atrial Fibrillation | 10718<br>(19.2%)                                        | 4828 (19.6%)           | 0.134          |

|                              | <b>ACE/ARB in patients with C</b>                       |                             | <b>P-Value</b> |
|------------------------------|---------------------------------------------------------|-----------------------------|----------------|
|                              | <b>AD and with DM<br/>or LVEF &lt;= 40%<br/>N=80552</b> |                             |                |
|                              | <b>Yes<br/>n =559<br/>33</b>                            | <b>No<br/>n =24619</b>      |                |
| <b>PCI within 12 months</b>  |                                                         |                             | <0.001         |
| Yes                          | 11779                                                   | 4509 (18.3%)                |                |
| No                           | (21.1%)                                                 | 19411 (78.8%)               |                |
| Unknown                      | 41946<br>(75.0%)<br>2208 (3.9%)                         | 699 (2.8%)                  |                |
| <b>CABG within 12 months</b> |                                                         |                             | <0.001         |
| Yes                          | 7642 (13.7%)                                            | 4621 (18.8%)                |                |
| No                           | 46083<br>(82.4%)                                        | 19286 (78.3%)<br>712 (2.9%) |                |
| Unknown                      | 2208 (3.9%)                                             |                             |                |
| <b>MI within 12 months</b>   |                                                         |                             | <0.001         |
| Yes                          | 7475 (13.4%)                                            | 3543 (14.4%)                |                |
| No                           | 46270<br>(82.7%)                                        | 20320 (82.5%)               |                |
| Unknown                      | 2188 (3.9%)                                             | 756 (3.1%)                  |                |

\*PAD: Peripheral Arterial Disease

† TIA: Transient Ischemic Attack

‡ PCI: Percutaneous Coronary Intervention

§ CABG: Coronary Artery Bypass Graft

□ MI: Myocardial Infarction

Supplemental Table 3 - Patient Characteristics by Statin Prescription

|                     | <b>Statin among patients with<br/>CAD and LDL&gt;100<br/>N=27628</b> |                       | <b>P-Value</b> |
|---------------------|----------------------------------------------------------------------|-----------------------|----------------|
|                     | <b>Yes<br/>n =188<br/>33</b>                                         | <b>No<br/>n =8795</b> |                |
| Age                 | 65.5 +/- 11.9                                                        | 66.4 +/- 13.6         | <0.001         |
| Male                | 10890 (58.1%)                                                        | 4194 (47.9%)          | <0.001         |
| Race                |                                                                      |                       | <0.001         |
| White               | 7492 (39.8%)                                                         | 3205 (36.4%)          |                |
| Black               | 1362 (7.2%)                                                          | 542 (6.2%)            |                |
| Other               | 88 (0.5%)                                                            | 25 (0.3%)             |                |
| Missing             | 9891 (52.5%)                                                         | 5023 (57.1%)          |                |
| Insurance           |                                                                      |                       | <0.001         |
| None                | 1150 (6.1%)                                                          | 518 (5.9%)            |                |
| Private             | 11182 (59.4%)                                                        | 5217 (59.3%)          |                |
| Public              | 5481 (29.1%)                                                         | 2443 (27.8%)          |                |
| Unknown             | 1020 (5.4%)                                                          | 617 (7.0%)            |                |
| Current Tobacco Use |                                                                      |                       | <0.001         |
| Yes                 | 2894 (15.4%)                                                         | 989 (11.2%)           |                |
| No                  | 13897 (73.8%)                                                        | 6578 (74.8%)          |                |
| Unknown             | 2042 (10.8%)                                                         | 1228 (14.0%)          |                |

|                       | <b>Statin among patients with<br/>CAD and LDL&gt;100<br/>N=27628</b> |                       | <b>P-Value</b> |
|-----------------------|----------------------------------------------------------------------|-----------------------|----------------|
|                       | <b>Yes<br/>n =188<br/>33</b>                                         | <b>No<br/>n =8795</b> |                |
| Heart Failure         | 4703 (25.0%)                                                         | 2163 (24.6%)          | 0.493          |
| Dyslipidemia          | 17314 (91.9%)                                                        | 6504 (74.0%)          | <0.001         |
| Diabetes              | 4403 (23.4%)                                                         | 1556 (17.7%)          | <0.001         |
| Hypertension          | 14435 (76.7%)                                                        | 6349 (72.3%)          | <0.001         |
| PAD                   | 2980 (15.8%)                                                         | 956 (10.9%)           | <0.001         |
| Prior Stroke/TIA      | 1408 (7.5%)                                                          | 832 (9.5%)            | <0.001         |
| Angina                | 3104 (16.5%)                                                         | 1177 (13.4%)          | <0.001         |
| Atrial Fibrillation   | 2290 (12.2%)                                                         | 1632 (18.6%)          | <0.001         |
| PCI within 12 months  |                                                                      |                       | <0.001         |
| Yes                   | 3532 (18.8%)                                                         | 980 (11.1%)           |                |
| No                    | 14181 (75.3%)                                                        | 6992 (79.5%)          |                |
| Unknown               | 1120 (5.9%)                                                          | 823 (9.4%)            |                |
| CABG within 12 months |                                                                      |                       | <0.001         |
| Yes                   | 14656 (77.8%)                                                        | 5954 (67.7%)          |                |
| No                    | 1110 (5.9%)                                                          | 822 (9.3%)            |                |
| Unknown               |                                                                      |                       |                |

|                     | <b>Statin among patients with<br/>CAD and LDL&gt;100<br/>N=27628</b> |                       | <b>P-Value</b> |
|---------------------|----------------------------------------------------------------------|-----------------------|----------------|
|                     | <b>Yes<br/>n =188<br/>33</b>                                         | <b>No<br/>n =8795</b> |                |
| MI within 12 months |                                                                      |                       | <0.001         |
| Yes                 | 3051 (16.2%)                                                         | 1263 (14.4%)          |                |
| No                  | 14798 (78.6%)                                                        | 6718 (76.4%)          |                |
| Unknown             | 984 (5.2%)                                                           | 814 (9.3%)            |                |

\*PAD: Peripheral Arterial Disease

† TIA: Transient Ischemic Attack

‡ PCI: Percutaneous Coronary Intervention

§ CABG: Coronary Artery Bypass Graft

□ MI: Myocardial Infarction

Supplemental Table 4 - Practice and Patient Factors Associated with Individual Prescription of  
Secondary Prevention Medications Following Multivariable Adjustment

|                                           | <b>Beta-Blockers</b>           | <b>ACEI/ARB</b>                | <b>Statins</b>                 |
|-------------------------------------------|--------------------------------|--------------------------------|--------------------------------|
|                                           | <b>Rate Ratio (95%<br/>CI)</b> | <b>Rate Ratio (95%<br/>CI)</b> | <b>Rate Ratio<br/>(95% CI)</b> |
| <b>Practice<br/>Median Rate<br/>Ratio</b> | <b>1.20 (1.16, 1.28)*</b>      | <b>1.19 (1.15, 1.26)*</b>      | <b>1.31 (1.24,<br/>1.44)*</b>  |
| Age: 65 < 75                              | 1.00 (0.98, 1.03)              | 1.02 (0.99, 1.05)              | 1.00 (0.98,<br>1.02)           |
| Age: >= 75                                | 1.01 (0.97, 1.05)              | 0.97 (0.93, 1.00)              | <b>0.94 (0.91,<br/>0.98)*</b>  |
| Female                                    | <b>0.95 (0.93, 0.97)*</b>      | <b>0.93 (0.91, 0.96)*</b>      | <b>0.91 (0.89,<br/>0.94)*</b>  |
| Insurance:<br>Private                     | 1.00 (0.95, 1.05)              | 1.01 (0.96, 1.06)              | 1.00 (0.96,<br>1.05)           |
| Insurance:<br>Public                      | 1.02 (0.97, 1.07)              | 1.02 (0.97, 1.07)              | 1.00 (0.94,<br>1.07)           |
| Insurance:<br>Unknown                     | 1.03 (0.95, 1.12)              | 1.04 (0.99, 1.10)              | 1.00 (0.94,<br>1.07)           |
| A-fib                                     | 1.03 (1.00, 1.05)              | 0.98 (0.96, 1.01)              | <b>0.87 (0.85,<br/>0.90)*</b>  |
| Dyslipidemia                              | <b>1.11 (1.07, 1.16)*</b>      | <b>1.10 (1.05, 1.15)*</b>      | <b>1.84 (1.37,</b>             |

|                                  |                           |                           |                               |
|----------------------------------|---------------------------|---------------------------|-------------------------------|
|                                  |                           |                           | <b>2.46)*</b>                 |
| Hypertension                     | <b>1.12 (1.08, 1.17)*</b> | <b>1.22 (1.11, 1.35)*</b> | 1.03 (1.00,<br>1.07)          |
| PAD                              | <b>1.07 (1.03, 1.10)*</b> | 1.05 (1.00, 1.09)         | <b>1.08 (1.03,<br/>1.14)*</b> |
| Prior stroke                     | <b>0.98 (0.96, 0.99)*</b> | <b>0.96 (0.94, 0.98)*</b> | <b>0.93 (0.90,<br/>0.96)*</b> |
| Angina                           | <b>1.06 (1.03, 1.09)*</b> | 0.99 (0.96, 1.02)         | 1.01 (0.97,<br>1.05)          |
| MI w/in 12<br>months: Yes        | 0.96 (0.92, 1.02)         | 0.98 (0.94, 1.02)         | 1.01 (0.96,<br>1.05)          |
| MI w/in 12<br>months:<br>Unknown | <b>0.79 (0.73, 0.85)*</b> | 0.94 (0.88, 1.01)         | <b>0.74 (0.57,<br/>0.97)*</b> |
| Current<br>Smoker: Yes           | 1.02 (1.00, 1.03)         | 0.98 (0.96, 1.00)         | <b>1.05 (1.02,<br/>1.08)*</b> |
| Current<br>Smoker:<br>Unknown    | 0.94 (0.89, 1.00)         | 0.97 (0.94, 1.00)         | 1.02 (0.98,<br>1.05)          |
| CABG w/in 12<br>months: Yes      | 0.97 (0.89, 1.05)         | 0.90 (0.79, 1.02)         | 0.90 (0.78,<br>1.04)          |
| CABG w/in 12<br>Months:          | <b>0.91 (0.83, 0.99)*</b> | <b>0.91 (0.83, 0.99)*</b> | 0.90 (0.79,<br>1.02)          |



|                             |                           |                           |                           |
|-----------------------------|---------------------------|---------------------------|---------------------------|
| Unknown                     |                           |                           |                           |
| PCI w/in 12 months: Yes     | <b>1.08 (1.05, 1.11)*</b> | <b>1.05 (1.02, 1.09)*</b> | <b>1.11 (1.08, 1.14)*</b> |
| PCI w/in 12 months: Unknown | 0.98 (0.92, 1.05)         | <b>1.07 (1.01, 1.13)*</b> | 1.10 (0.97, 1.24)         |
| Diabetes                    | <b>1.05 (1.03, 1.07)*</b> | <b>0.89 (0.86, 0.91)*</b> | <b>1.06 (1.02, 1.10)*</b> |
| Heart Failure               | <b>1.09 (1.04, 1.15)*</b> | <b>1.05 (1.02, 1.08)*</b> | <b>0.96 (0.93, 0.99)*</b> |

\*PAD: Peripheral Arterial Disease

† MI: Myocardial Infarction

‡ CABG: Coronary Artery Bypass Graft

§ PCI: Percutaneous Coronary Intervention

### Beta Blocker Rate in patients with CAD and MI history

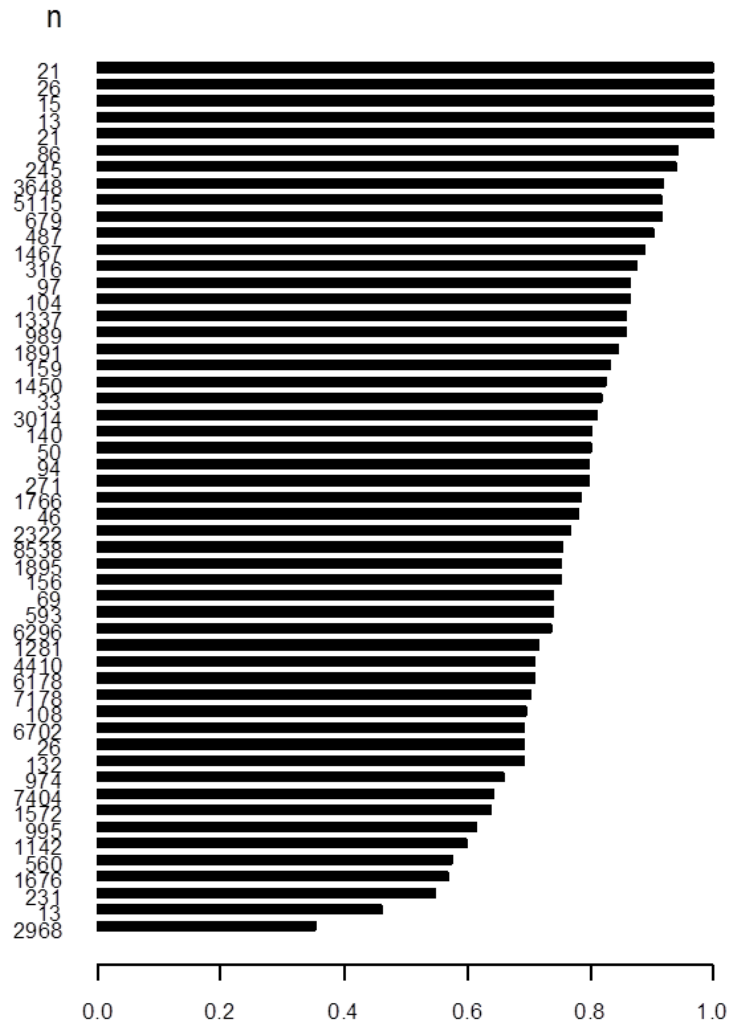

ACE/ARB in patients with CAD  
and with DM or LVEF <= 40%

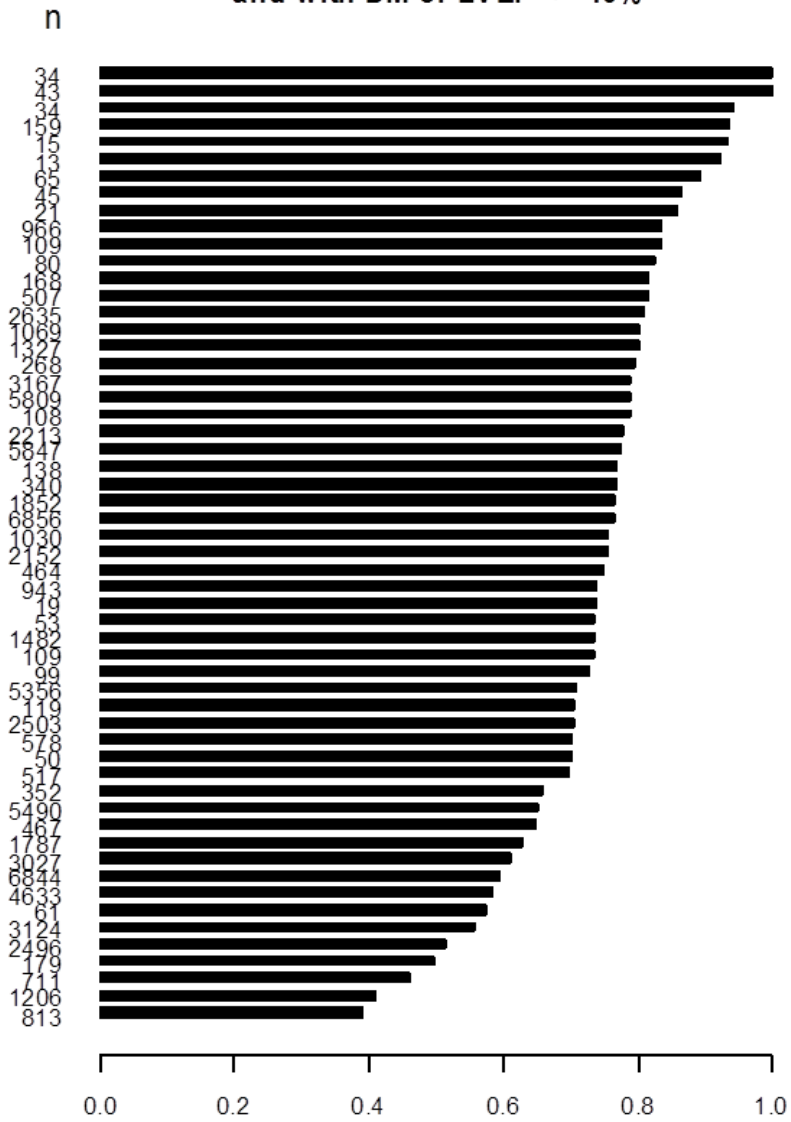

### Statin in patients with CAD and LDL > 100

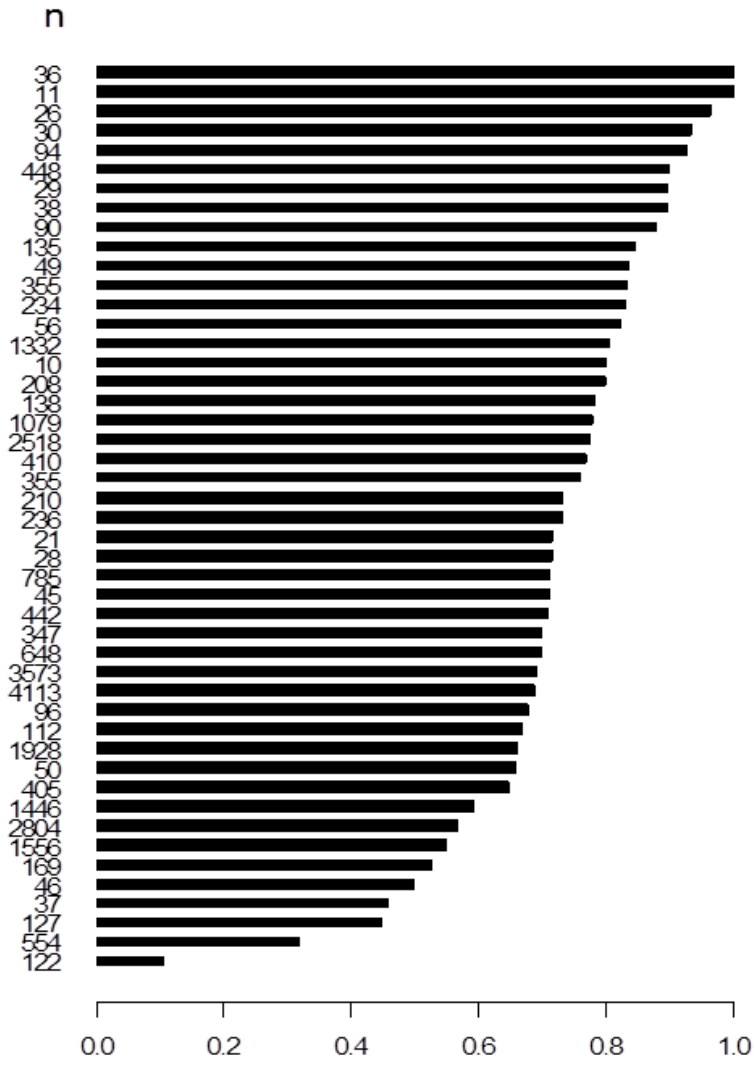

Supplement: NIHMS556020-supplement-01.pdf [file NIHMS556020-supplement-01.pdf]
